# Supplementary material for: Leonurine mitigates experimental autoimmune prostatitis by modulating macrophage M1 polarization through the TLR4/NF-κB signaling pathway
Source: Research Square preprint supplement (doi:10.21203/rs.3.rs-7988329/v1), 2025-11-14
Supplement: Supplementary file 1 [file 101306de1ec26737e5fcb9ad.docx]

**Figure S1**

The primer sequences.

| Gene | Forward primer sequence (5′to 3′) | Reverse primer sequence (3′to 5′) |
| --- | --- | --- |
| iNOS | GTTCTCAGCCCAACAATACAAGA | GTGGACGGGTCGATGTCAC |
| IL-6 | CTTCTTGGGACTGATGCTGGTGAC | TCTGTTGGGAGTGGTATCCTCTGTG |
| IL-1β | CACTACAGGCTCCGAGATGAACAAC | TGTCGTTGCTTGGTTCTCCTTGTAC |
| TNF-α | CGCTCTTCTGTCTACTGAACTTCGG | GTGGTTTGTGAGTGTGAGGGTCTG |
| β-Actin | GGCTGTATTCCCCTCCATCG | CCAGTTGGTAACAATGCCATGT |
